# Supplementary material
Source: Royal Society of Chemistry journal article supplement (doi:10.1039/d5cp04475h)
Supplement: d5cp04475h1.pdf [file d5cp04475h1.pdf]

## Supporting Information

### Geometry, electronic structure, and optical properties of boron cages: A first-principles DFT study

Kashinath T. Chavan<sup>1</sup>, Ihsan Boustani<sup>2</sup>, and Alok Shukla<sup>1</sup>

<sup>1</sup>*Department of Physics, Indian Institute of Technology Bombay, Mumbai 400076, India.*

<sup>2</sup>*Theoretical and Computational Chemistry, Faculty of Mathematics and Natural Sciences, Bergische Universität Wuppertal, D-42097 Wuppertal, Germany*

-----

Oscillator strengths and the configurations with significantly large coefficients in the TDDFT wave functions of the excited states giving rise to various peaks in the dynamically stable clusters.

#### 1. B<sub>32</sub>

| Peak | Energy (eV) | OS     | Configuration |
|------|-------------|--------|---------------|
| I    | 2.5953      | 0.0163 | H-1:L+3       |
|      | 2.5963      | 0.0164 | H-2:L+3       |
|      | 2.5966      | 0.0164 | H-2:L+4       |

#### 2. B<sub>42</sub>

| Peak | Energy (eV) | OS     | Configuration |
|------|-------------|--------|---------------|
| I    | 1.3164      | 0.0022 | H:L           |
|      | 1.4240      | 0.0039 | H-1:L         |
| II   | 2.0928      | 0.0063 | H-1:L+2       |
|      | 2.1549      | 0.0018 | H-2:L+2       |
| III  | 2.4337      | 0.0034 | H-5:L         |
|      | 2.4856      | 0.0055 | H-1:L+5       |
| IV   | 2.6277      | 0.0037 | H-1:L+6       |
|      | 2.6527      | 0.0033 | H-5:L+1       |
|      | 2.7032      | 0.0035 | H-2:L+2       |
|      | 2.7609      | 0.0055 | H:L+7         |
|      | 2.8176      | 0.0034 | H-1:L+7       |
|      | 2.9111      | 0.0081 | H-3:L+3       |
|      | 2.9703      | 0.0061 | H-8:L         |

|     |        |        |          |
|-----|--------|--------|----------|
|     | 2.9929 | 0.0032 | H:L+8    |
|     | 3.0012 | 0.0047 | H-4:L+2  |
| V   | 3.1123 | 0.0037 | H-5:L+1  |
|     | 3.1563 | 0.0062 | H-3:L+5  |
|     | 3.1654 | 0.0045 | H-1:L+9  |
|     | 3.2083 | 0.0044 | H-4:L+3  |
|     | 3.2330 | 0.0039 | H:L+10   |
|     | 3.3083 | 0.0058 | H-10:L   |
|     | 3.3285 | 0.0055 | H-1:L+10 |
|     | 3.3742 | 0.0044 | H-4:L+4  |
|     | 3.4326 | 0.0049 | H-1:L+11 |
|     | 3.4588 | 0.0097 | H-5:L+4  |
|     | 3.4765 | 0.0123 | H-3:L+7  |
|     | 3.5145 | 0.0048 | H-2:L+11 |
| VI  | 3.8207 | 0.0047 | H:L+14   |
|     | 3.8310 | 0.0120 | H:L+13   |
|     | 3.8467 | 0.0081 | H-3:L+9  |
|     | 3.8803 | 0.0046 | H-8:L+3  |
|     | 3.8900 | 0.0067 | H-7:L+4  |
|     | 3.8958 | 0.0064 | H-1:L+13 |
|     | 3.9187 | 0.0027 | H-1:L+14 |
|     | 3.9312 | 0.0075 | H-1:L+14 |
|     | 3.9448 | 0.0027 | H-9:L+2  |
| VII | 3.9630 | 0.0057 | H-4:L+8  |
|     | 3.9695 | 0.0022 | H-2:L+13 |
|     | 3.9799 | 0.0062 | H-2:L+13 |
|     | 3.9847 | 0.0063 | H-4:L+8  |
|     | 4.0037 | 0.0064 | H-6:L+7  |
|     | 4.0097 | 0.0107 | H-2:L+14 |

### 3. B<sub>60</sub>

| Peak | Energy (eV) | OS     | Configuration |
|------|-------------|--------|---------------|
| I    | 1.2632      | 0.0037 | H-2:L         |
|      | 1.4624      | 0.0029 | H-4:L         |
|      | 1.5633      | 0.0164 | H-2:L+2       |
| II   | 1.8151      | 0.0109 | H-2:L+3       |
|      | 1.8451      | 0.0092 | H-4:L+2       |
|      | 2.0052      | 0.0053 | H-4:L+3       |
| III  | 2.1232      | 0.0055 | H:L+5         |
|      | 2.1750      | 0.0048 | H-7:L         |
|      | 2.2082      | 0.0039 | H-1:L+3       |

|  |        |        |         |
|--|--------|--------|---------|
|  | 2.2353 | 0.0059 | H-2:L+4 |
|  | 2.3377 | 0.0081 | H:L+6   |
|  | 2.4155 | 0.0089 | H-3:L+3 |
|  | 2.4420 | 0.0085 | H-7:L+1 |
|  | 2.5099 | 0.0117 | H-3:L+5 |
|  | 2.5315 | 0.0096 | H-1:L+6 |
|  | 2.5927 | 0.0127 | H:L+8   |
|  | 2.6842 | 0.0051 | H-3:L+6 |
|  | 2.7297 | 0.0044 | H-10:L  |
|  | 2.7669 | 0.0071 | H-10:L  |

#### 4. B<sub>72</sub>

| Peak | Energy (eV) | OS     | Configuration |
|------|-------------|--------|---------------|
| I    | 0.52467     | 0.0028 | H-2:L         |
|      | 0.52945     | 0.0030 | H-2:L+1       |
|      | 0.78933     | 0.0069 | H-5:L         |
|      | 0.81205     | 0.0058 | H-4:L+2       |
|      | 0.81246     | 0.0056 | H-5:L+2       |
| II   | 1.27488     | 0.0039 | H-3:L+5       |
|      | 1.27568     | 0.0037 | H-3:L+6       |
|      | 1.32940     | 0.0265 | H-2:L+4       |
|      | 1.43608     | 0.0034 | H-4:L+3       |
|      | 1.43626     | 0.0030 | H-5:L+3       |
|      | 1.53923     | 0.0187 | H-4:L+4       |
|      | 1.54107     | 0.0179 | H-5:L+5       |
|      | 1.58052     | 0.0087 | H-5:L+5       |
|      | 1.76986     | 0.0043 | H-1:L+7       |
|      | 1.77269     | 0.0043 | H-1:L+10      |

#### 5. B<sub>92</sub> (Icosahedron)

| Peak | Energy (eV) | OS     | Configuration |
|------|-------------|--------|---------------|
| I    | 1.60202     | 0.0352 | H-2:L         |
|      | 1.6020      | 0.0352 | H-1:L+1       |
|      | 1.6020      | 0.0354 | H:L+3         |

## 6. B<sub>122</sub>

| Peak | Energy (eV) | OS     | Configuration |
|------|-------------|--------|---------------|
| I    | 0.874476728 | 0.0032 | H:L+3         |
|      | 2           | 0.0024 | H:L+4         |
|      | 0.913461909 | 0.0024 | H-5:L         |
|      | 7           | 0.0022 | H-6:L         |
|      | 0.915079969 | 0.0043 | H:L+5         |
|      | 0.975032714 | 0.004  | H-3:L+1       |
|      | 9           | 0.0041 | H-4:L+1       |
|      | 1.025883572 | 0.0025 | H:L+6         |
|      | 1.097341131 | 0.0030 | H-2:L+4       |
|      | 1.111248207 | 0.0046 | H-6:L+1       |
|      | 1.161879721 | 0.0023 | H-6:L+2       |
|      | 1.238529009 | 0.0047 | H-6:L+3       |
|      | 1.244621195 | 0.0038 | H-3:L+5       |
|      | 1.352328538 | 0.0020 | H-5:L+4       |
|      | 1.357585216 | 0.0030 | H-9:L         |
|      | 1.39697342  | 0.0031 | H-6:L+4       |
|      | 1.421478354 | 0.0039 | H-10:L        |
|      | 1.429113664 | 0.0036 | H-7:L+1       |
|      | 1.435267932 | 0.0030 | H-5:L+5       |
|      | 1.466695669 | 0.0021 | H-6:L+5       |
|      | 1.505082547 | 0.0043 | H-4:L+6       |
|      | 1.510491764 | 0.0034 | H-11:L        |
|      | 1.533281207 | 0.0020 | H:L+9         |
|      | 1.565160449 | 0.0034 | H-7:L+3       |
|      | 1.582238196 |        |               |
|      | 1.603623941 |        |               |
|      | 1.628585118 |        |               |
